# Supplementary material for: Functional characterization of the alanine-serine-cysteine exchanger of Carnobacterium sp AT7
Source: PubMed Central journal article supplement — J Gen Physiol. 2019 Jan 29;151(4):505–17. doi: 10.1085/jgp.201812195 (PMC6445583; doi:10.1085/jgp.201812195), 2019-01-29
Supplement: JGP_201812195_sm.pdf [file JGP_201812195_sm.pdf]

## Supplemental material

Bartoccioni et al., <https://doi.org/10.1085/jgp.201812195>

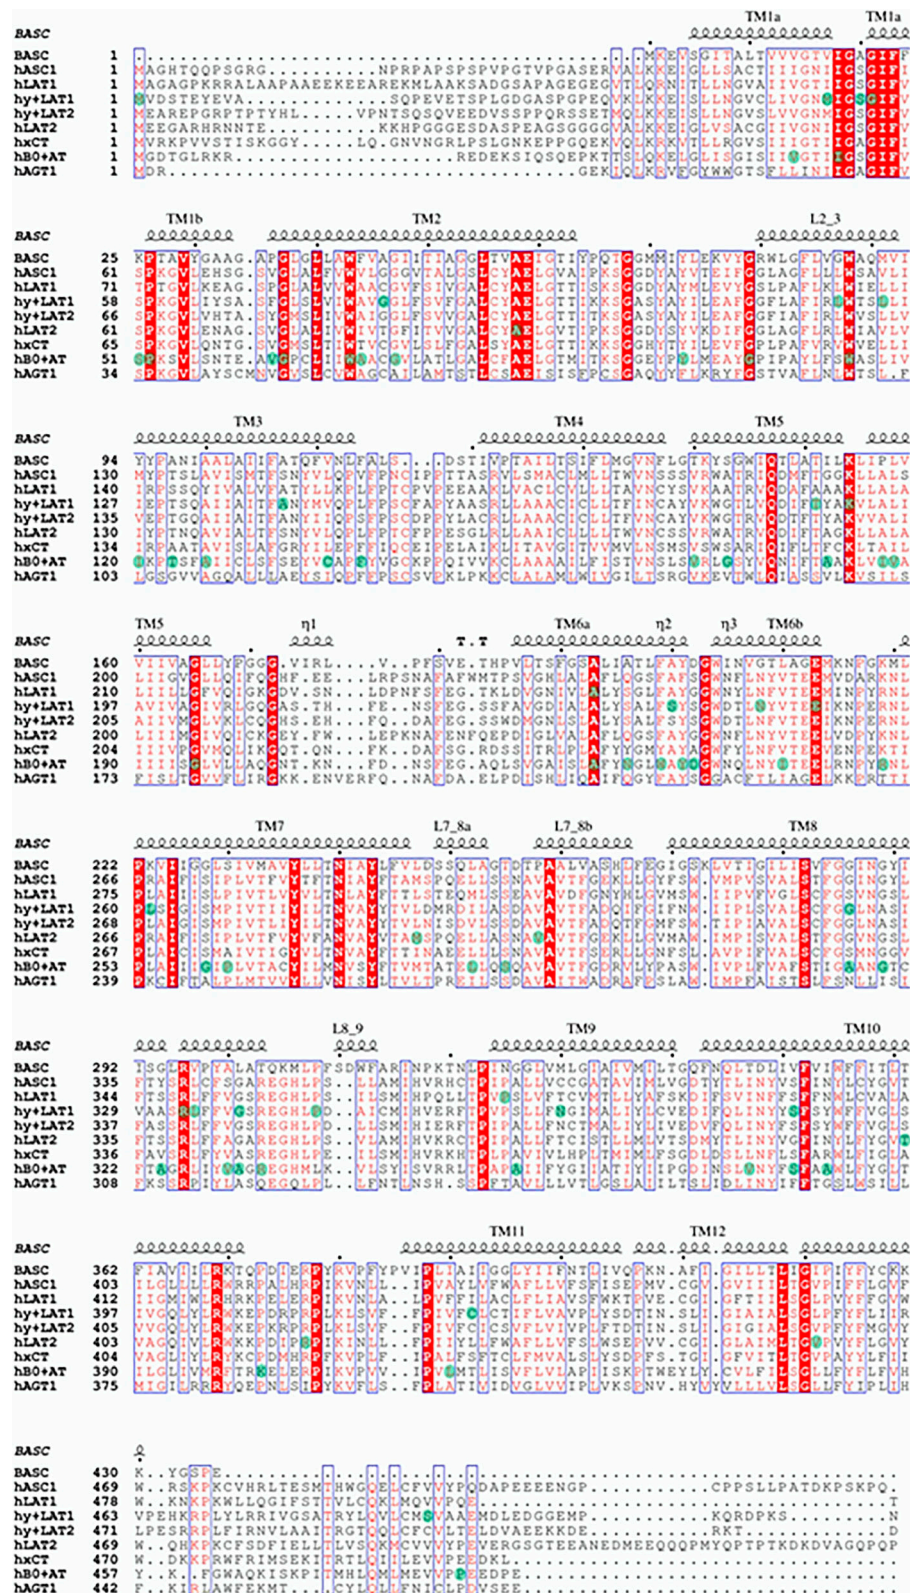

Figure S1. **BasC sequence alignment with human LATs.** Multi sequence alignment was done with PSI/TM-Coffee server (Floden et al., 2016). Mutated residues associated with autism (LAT1), age-related hearing loss (LAT2), cystinuria ( $b^{0+}$ AT), and LPI ( $y^+$ LAT1) are shown in green circles.

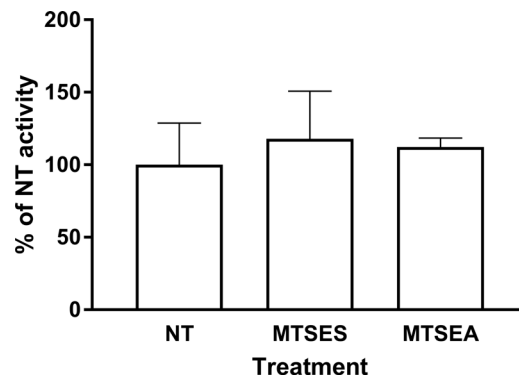

Figure S2. **Effect of cysteine-modifying reagents on L-serine/L-alanine exchange in cysless BasC PLs.**  $10\ \mu\text{M}$   $[^3\text{H}]$ L-serine ( $0.5\ \mu\text{Ci}/\text{data point}$ ) influx ( $\text{pmol}/\mu\text{g protein} \cdot \text{s}$ ) experiments in cysless BasC-GFP-PLs, treated with  $1\ \text{mM}$  MTSES for 15 min or  $5\ \text{mM}$  MTSEA for 30 min. Transport was expressed as the percentage of the transport in BasC-PLs containing  $4\ \text{mM}$  L-alanine and nontreated. Data are from three experiments with three replicates per condition.

## Reference

Floden, E.W., P.D. Tommaso, M. Chatzou, C. Magis, C. Notredame, and J.M. Chang. 2016. PSI/TM-Coffee: a web server for fast and accurate multiple sequence alignments of regular and transmembrane proteins using homology extension on reduced databases. *Nucleic Acids Res.* 44(W1):W339–W343. <https://doi.org/10.1093/nar/gkw300>
